# Supplementary material for: Agents Affecting the Plant Functional Traits in National Soil and Water Conservation Demonstration Park (China)
Source: MDPI journal article supplement (doi:10.3390/plants11212891), 2022-10-28
Supplement: s1 [file s1]

## Supporting information

### Supplement Figures:

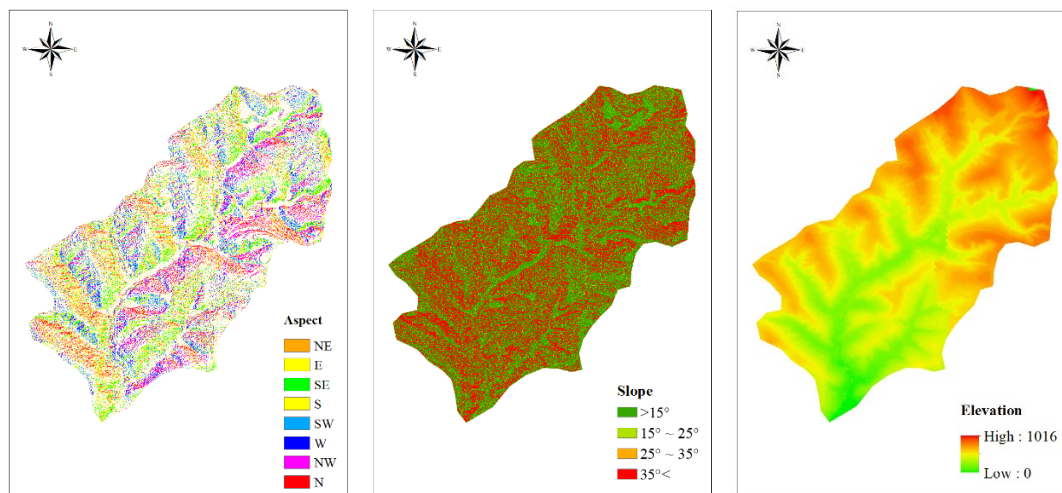

**Figure S1.** Slope aspect map, slope map and elevation map of the study area.

## Supplement Tables:

**Table S1.** Dominant species information.

| Family                        | Life form            | Frequency | Mean cover | Min cover | Max cover |
|-------------------------------|----------------------|-----------|------------|-----------|-----------|
| Asteraceae Bercht. & J. Presl | Herbs perennial      | 25        | 0.197      | 0.07      | 0.46      |
| Valerianaceae                 | Herbs perennial      | 2         | 0.265      | 0.16      | 0.37      |
| Poaceae                       | Herbs perennial      | 18        | 0.217      | 0.06      | 0.42      |
| Leguminosae sp.               | Herbaceous subshrubs | 73        | 0.362      | 0.12      | 0.72      |
| Poaceae                       | Herbs perennial      | 22        | 0.237      | 0.04      | 0.5       |
| Asclepiadaceae                | Herbs perennial      | 9         | 0.184      | 0.08      | 0.35      |
| Leguminosae sp.               | Small shrubs         | 25        | 0.386      | 0.14      | 0.6       |
| Poaceae                       | Herbs perennial      | 1         | 0.07       | 0.07      | 0.07      |
| Plumbaginaceae Juss.          | Herbs perennial      | 35        | 0.341      | 0.1       | 0.78      |
| Asteraceae Bercht. & J. Presl | Herbs perennial      | 1         | 0.29       | 0.29      | 0.29      |
| Euphorbiaceae                 | Annual herb          | 1         | 0.06       | 0.06      | 0.06      |
| Papilionaceae                 | Herbs perennial      | 1         | 0.25       | 0.25      | 0.25      |
| Poaceae                       | Annual herb          | 51        | 0.283      | 0.03      | 0.58      |
| Gramineae                     | Herbs perennial      | 2         | 0.235      | 0.15      | 0.32      |
| Asteraceae Bercht. & J. Presl | Annual herb          | 21        | 0.274      | 0.05      | 0.48      |
| Chenopodiaceae                | Annual herb          | 1         | 0.18       | 0.18      | 0.18      |
| Zygophyllaceae R. Br.         | Annual herb          | 1         | 0.1        | 0.1       | 0.1       |
| Asteraceae Bercht. & J. Presl | Herbs perennial      | 21        | 0.29       | 0.15      | 0.58      |
| Bignoniaceae Juss.            | Herbs perennial      | 1         | 0.1        | 0.1       | 0.1       |
| Asteraceae Bercht. & J. Presl | Herbs perennial      | 1         | 0.1        | 0.1       | 0.1       |
| Cyperaceae Juss.              | Herbs perennial      | 20        | 0.355      | 0.13      | 0.75      |
| Rubiaceae Juss.               | Herbs perennial      | 10        | 0.354      | 0.15      | 0.63      |
| Solanaceae Juss.              | Annual herb          | 5         | 0.33       | 0.18      | 0.42      |
| Ranunculaceae Juss.           | Herbs perennial      | 1         | 0.55       | 0.55      | 0.55      |
| Convolvulaceae Juss.          | Herbs perennial      | 5         | 0.224      | 0.14      | 0.32      |
| Papilionaceae                 | Annual herb          | 2         | 0.165      | 0.15      | 0.18      |
| Liliaceae                     | Herbs perennial      | 2         | 0.24       | 0.09      | 0.39      |
| Poaceae                       | Herbs perennial      | 9         | 0.263      | 0.19      | 0.65      |
| Asteraceae Bercht. & J. Presl | Herbs perennial      | 6         | 0.307      | 0.12      | 0.54      |
| Leguminosae sp.               | Herbs perennial      | 1         | 0.2        | 0.2       | 0.2       |
| Asteraceae Bercht. & J. Presl | Herbaceous subshrubs | 17        | 0.233      | 0.12      | 0.5       |
| Brassicaceae                  | Herbs perennial      | 1         | 0.25       | 0.25      | 0.25      |
| Poaceae                       | Herbs perennial      | 1         | 0.18       | 0.18      | 0.18      |
| Chenopodiaceae                | Annual herb          | 5         | 0.312      | 0.2       | 0.53      |

**Table S2.** Details of variables used in the research.

| Latent Variable                    | Observed Variable               | Abbreviation | Detail                                                                                  |
|------------------------------------|---------------------------------|--------------|-----------------------------------------------------------------------------------------|
| Soil property                      | Soil organic matter             | SOM          | The content of organic matter component of soil                                         |
|                                    | Soil water content              | SWC          | The content of water in soil                                                            |
|                                    | Soil bulk density               | BD           | The weight of soil in a unit volume                                                     |
|                                    | Maximum water capacity          | MWC          | The moisture content of soil when the capillary is filled with water                    |
|                                    | Total phosphorus content        | TP           | The content of total phosphorus of soil                                                 |
|                                    | Total nitrogen content          | TN           | The content of total nitrogen of soil                                                   |
|                                    | Margalef species richness index | MAR          | Species richness index based on total number                                            |
| Vegetation diversity               | Shannon diversity index         | SHA          | Index of species diversity                                                              |
|                                    | Simpson diversity index         | SIM          | Index of species dominance                                                              |
|                                    | Pielou's evenness index         | PIE          | Index of species evenness                                                               |
|                                    | Gleason richness index          | GLE          | Species richness index based on plot area                                               |
|                                    | Total number of shrubs          | N            | Total number of plant individuals                                                       |
| Site conditions                    | Total shrub species             | S            | Total number of plant species                                                           |
|                                    | Slope                           | SLO          | Mean angle of the site to the horizontal                                                |
|                                    | Altitude                        | ATT          | Mean altitude of each plot                                                              |
|                                    | Aspect                          | ASP          | The direction of the projection of a slope normal onto a horizontal plan                |
|                                    | Slope positions                 | SP           | Geomorphologic position on the slope where the sample site is located                   |
| Functional character of vegetation | Blade thickness                 | LT           | Blade thickness of each plot                                                            |
|                                    | Leaf dry weight                 | LD           | Leaf dry weight of each plot                                                            |
|                                    | organic matter of leaves        | LOM          | Organic matter of leaves in each plot                                                   |
|                                    | Total nitrogen content          | LTN          | Total nitrogen content of leaves in each plot                                           |
|                                    | Total phosphorus content        | LTP          | Total phosphorus content of leaves in each plot                                         |
|                                    | Nitrogen to phosphorus ratio    | NP           | The ratio of the amount of all nitrogen to the amount of phosphorus in each plot        |
|                                    | Leaf tissue density             | LTD          | Ratio of leaf dry weight to leaf volume                                                 |
|                                    | Leaf area                       | LA           | Leaves area of each plot                                                                |
|                                    | Specific leaf area              | SLA          | Ratio of leaf area to dry weight in each plot                                           |
|                                    | Vegetation coverage             | CO           | The aggregate of all vertically projected plants onto the ground surface                |
|                                    | Plant height                    | PH           | Average height of all the plants in a plot                                              |
|                                    | Ratio of dominant species       | RDS          | The proportion of biomass of all dominant species in the community to the total biomass |

**Table S3.** The data details.

|         |         |         |           |           |          |         |            |           |
|---------|---------|---------|-----------|-----------|----------|---------|------------|-----------|
| Index   | SOM     | TP      | TN        | SWC       | BD       | MWC     | ALT        | SLO       |
| Average | 7.61±4. | 0.59±0. | 0.41±0.21 | 0.15±0.08 | 1.25±0.1 | 0.40±0. | 979.04±61. | 25.19±12. |
| e       | 24      | 12      |           |           | 2        | 09      | 15         | 23        |
| Index   | ASP     | SP      | MAR       | GLE       | SIM      | SHA     | PIE        | S         |
| Average | 0.65±0. | 0.6±0.2 | 1.69±1.15 | 8.88±5.69 | 0.74±0.1 | 1.65±0. | 0.74±0.16  | 9±5       |
| e       | 35      |         |           |           | 8        | 86      |            |           |
| Index   | N       | LT      | LD        | LOM       | LTN      | LTP     | NP         | LTD       |
| Average | 196±13  | 0.16±0. | 24.93±19. | 456.2±51. | 42.3±24. | 2.70±1. | 15.98±7.92 | 7.87±5.51 |
| e       | 4       | 26      | 23        | 8         | 68       | 54      |            |           |
| Index   | LA      | SLA     | CO        | PH        | RDS      |         |            |           |
| Average | 4.04±3. | 9.84±6. | 0.77±0.23 | 25.53±15. | 0.80±0.2 |         |            |           |
| e       | 39      | 85      |           | 45        |          |         |            |           |
